# Supplementary material for: Description of symptom course in a telemedicine monitoring clinic for acute symptomatic COVID-19: a retrospective cohort study
Source: PubMed Central journal article supplement — BMJ Open. 2021 Mar 5;11(3):e044154. doi: 10.1136/bmjopen-2020-044154 (PMC7938467; doi:10.1136/bmjopen-2020-044154), 2021-03-05
Supplement: bmjopen-2020-044154supp001.pdf [file bmjopen-2020-044154supp001.pdf]

Table 1 Cox models with AIC (time interaction terms for time varying covariates)

| Symptom                | Covariates                        | Hazard Ratio (95% CI) | p value | AIC     |
|------------------------|-----------------------------------|-----------------------|---------|---------|
| Abdominal Pain         | Immune suppression                | 0.26 (0.11-0.62)      | 0.002   | 654.96  |
| Body aches             | Female                            | 1.3 (0.71-2.38)       | 0.392   | 1656.88 |
|                        | Mild initial symptom severity     | reference             |         |         |
|                        | Moderate initial symptom severity | 0.5 (0.36-0.68)       | <0.001  |         |
|                        | Severe initial symptom severity   | 0.28 (0.09-0.9)       | 0.033   |         |
|                        | time*Female                       | 0.9 (0.84-0.96)       | 0.001   |         |
| Chest Tightness        | Mild initial symptom severity     | reference             |         | 996.36  |
|                        | Moderate initial symptom severity | 0.72 (0.49-1.04)      | 0.076   |         |
|                        | Severe initial symptom severity   | 0.26 (0.08-0.85)      | 0.025   |         |
| Chills                 | Female                            | 0.72 (0.52-0.99)      | 0.047   | 1522.9  |
|                        | Mild initial symptom severity     | reference             |         |         |
|                        | Moderate initial symptom severity | 0.57 (0.42-0.78)      | 0.000   |         |
|                        | Severe initial symptom severity   | 0.36 (0.14-0.91)      | 0.030   |         |
| Confusion              | No significant covariates         | 0.73 (0.22-2.38)      | 0.600   | 73.94   |
| Sinus Congestion       | Female                            | 0.65 (0.46-0.9)       | 0.011   | 1460.06 |
|                        | Mild initial symptom severity     | reference             |         |         |
|                        | Moderate initial symptom severity | 0.59 (0.42-0.83)      | 0.003   |         |
|                        | Severe initial symptom severity   | 0.64 (0.16-2.6)       | 0.531   |         |
| Cough                  | Mild initial symptom severity     | reference             |         | 1529.85 |
|                        | Moderate initial symptom severity | 0.64 (0.46-0.89)      | 0.008   |         |
|                        | Severe initial symptom severity   | 0.24 (0.06-0.96)      | 0.044   |         |
| Diarrhea               | Race=White                        | reference             |         | 1195.59 |
|                        | Race=Black                        | 1.66 (1.05-2.63)      | 0.029   |         |
|                        | Race=Other                        | 1.69 (1.03-2.78)      | 0.038   |         |
|                        | Mild initial symptom severity     | reference             |         |         |
|                        | Moderate initial symptom severity | 0.63 (0.44-0.89)      | 0.008   |         |
|                        | Severe initial symptom severity   | 0.3 (0.07-1.24)       | 0.096   |         |
| Dizziness              | Mild initial symptom severity     | reference             |         | 1029.99 |
|                        | Moderate initial symptom severity | 0.6 (0.42-0.86)       | 0.005   |         |
|                        | Severe initial symptom severity   | 0.24 (0.06-1)         | 0.050   |         |
| Current Fever          | Mild initial symptom severity     | reference             |         | 995.01  |
|                        | Moderate initial symptom severity | 0.74 (0.51-1.08)      | 0.118   |         |
|                        | Severe initial symptom severity   | 0.16 (0.04-0.74)      | 0.018   |         |
|                        | Immune suppression                | 0.4 (0.17-0.93)       | 0.033   |         |
|                        | Obesity                           | 0.63 (0.42-0.93)      | 0.022   |         |
| Headache               | Female                            | 0.61 (0.45-0.83)      | 0.002   | 1891.72 |
|                        | Mild initial symptom severity     | reference             |         |         |
|                        | Moderate initial symptom severity | 0.5 (0.37-0.68)       | 0.000   |         |
|                        | Severe initial symptom severity   | 0.49 (0.16-1.56)      | 0.231   |         |
| Joint Pain             | Obesity                           | 0.67 (0.44-1.01)      | 0.059   | 880.52  |
| Loss of smell or taste | Female                            | 0.52 (0.36-0.74)      | <0.001  | 1296.92 |

|                   |                                        |                  |       |        |
|-------------------|----------------------------------------|------------------|-------|--------|
|                   | Immune suppression                     | 0.25 (0.08-0.79) | 0.018 |        |
| Nausea            | Female                                 | 0.56 (0.35-0.91) | 0.018 | 793.72 |
| Rash              | No significant covariates              | 0.36 (0.04-2.86) | 0.332 |        |
| SOB with exertion | No significant covariates              | 1.36 (0.55-3.33) | 0.502 |        |
| SOB at rest       | Race=White                             | reference        |       | 493.45 |
|                   | Race=Black                             | 0.38 (0.19-0.76) | 0.006 |        |
|                   | Race=Other                             | 0.62 (0.3-1.29)  | 0.203 |        |
| Sore Throat       | Mild initial symptom severity          | reference        |       | 891.43 |
|                   | Moderate initial symptom severity      | 0.88 (0.49-1.59) | 0.673 |        |
|                   | Severe initial symptom severity        | 0.04 (0-1.01)    | 0.051 |        |
|                   | time*Moderate initial symptom severity | 0.97 (0.92-1.02) | 0.253 |        |
|                   | time*Severe initial symptom severity   | 1.11 (0.97-1.27) | 0.144 |        |
| Wheezing          | Asthma                                 | 0.37 (0.19-0.7)  | 0.002 | 387.95 |

SOB=shortness of breath
