# Supplementary material for: Description of symptom course in a telemedicine monitoring clinic for acute symptomatic COVID-19: a retrospective cohort study
Source: PubMed Central journal article supplement — BMJ Open. 2021 Mar 5;11(3):e044154. doi: 10.1136/bmjopen-2020-044154 (PMC7938467; doi:10.1136/bmjopen-2020-044154), 2021-03-05
Supplement: bmjopen-2020-044154supp002.pdf [file bmjopen-2020-044154supp002.pdf]

Table 2 Univariate analysis of covariates predicting symptom duration with symptom analyzed as strata comparing accelerated time models (AFT) and Cox proportional hazards

| Covariate                         | AFT log logistic distribution p value | AFT log normal distribution p value | Cox PH p value |
|-----------------------------------|---------------------------------------|-------------------------------------|----------------|
| Female                            | <0.001                                | <0.001                              | <0.001         |
| Moderate initial symptom severity | <0.001                                | <0.001                              | <0.001         |
| Severe initial symptom severity   | <0.001                                | <0.001                              | <0.001         |
| Race = Black                      | 0.612                                 | <0.844                              | 0.137          |
| Race = Others                     | 0.21                                  | <0.223                              | 0.578          |
| Age > 60                          | 0.112                                 | 0.103                               | 0.018          |
| Alcohol abuse                     | 0.339                                 | 0.340                               | 0.059          |
| Asthma                            | <0.001                                | <0.001                              | <0.001         |
| Cancer                            | 0.227                                 | 0.324                               | 0.306          |
| Pregnant                          | 0.065                                 | 0.056                               | 0.39           |
| COPD                              | 0.306                                 | 0.156                               | 0.104          |
| CAD                               | 0.215                                 | 0.372                               | 0.264          |
| Diabetes                          | 0.412                                 | 0.423                               | 0.213          |
| Drug abuse                        | 0.373                                 | 0.359                               | 0.087          |
| Heart failure                     | 0.304                                 | 0.246                               | 0.144          |
| Hypertension                      | 0.109                                 | 0.242                               | 0.212          |
| Immune suppression                | <0.001                                | <0.001                              | <0.001         |
| Lung disease                      | 0.165                                 | 0.394                               | 0.152          |
| Obesity                           | <0.001                                | <0.001                              | 0.001          |
| Renal disease                     | 0.781                                 | 0.753                               | 0.938          |

CAD=Coronary artery disease; COPD=Chronic obstructive pulmonary disease
