# Supplementary material for: Description of symptom course in a telemedicine monitoring clinic for acute symptomatic COVID-19: a retrospective cohort study
Source: PubMed Central journal article supplement — BMJ Open. 2021 Mar 5;11(3):e044154. doi: 10.1136/bmjopen-2020-044154 (PMC7938467; doi:10.1136/bmjopen-2020-044154), 2021-03-05
Supplement: bmjopen-2020-044154supp003.pdf [file bmjopen-2020-044154supp003.pdf]

Table 3 Aikake information criteria for different distributions in the accelerated failure time model before removing nonsignificant covariates

| Symptom                | Log Normal | Log Logistic | Exponential | Weibull | Logistic | Gaussian | CoxPH   |
|------------------------|------------|--------------|-------------|---------|----------|----------|---------|
| Abdominal Pain         | 522.31     | 528.74       | 538.46      | 540.07  | 641.16   | 661.67   | 662.13  |
| Body Aches             | 1271.56    | 1268.97      | 1297.72     | 1287.54 | 1433.33  | 1457.26  | 1668.71 |
| Chest Tightness        | 869.11     | 871.32       | 873.9       | 868.28  | 935.01   | 941.97   | 1001.29 |
| Chills                 | 1047.42    | 1052.25      | 1070.01     | 1050.3  | 1150.68  | 1190     | 1529.56 |
| Confusion              | 56.61      | 57.37        | 78.53       | 54.12   | 59.32    | 59.33    | 69.03   |
| Congestion             | 1219.12    | 1217.91      | 1218.98     | 1217.15 | 1328.11  | 1331.83  | 1467.46 |
| Cough                  | 1355.72    | 1348.91      | 1361.19     | 1346.34 | 1424     | 1420.67  | 1537.54 |
| Diarrhea               | 906.87     | 916          | 921.74      | 917.28  | 1009.03  | 1020.68  | 1202.37 |
| Dizziness              | 779.7      | 787.85       | 792.09      | 792.42  | 899.24   | 910.85   | 1033.56 |
| Current Fever          | 775.89     | 783.77       | 781.93      | 773.33  | 848.94   | 853.62   | 998.89  |
| Headache               | 1423.19    | 1427.12      | 1435.94     | 1431.09 | 1581.8   | 1596.36  | 1899.1  |
| Joint Pain             | 767.77     | 771.15       | 772.18      | 773.85  | 871.19   | 879.27   | 883.76  |
| Loss of smell or taste | 1127.54    | 1119.6       | 1147.22     | 1118.66 | 1181.16  | 1183.8   | 1301.67 |
| Nausea                 | 660.31     | 663.2        | 666.42      | 666.23  | 740.78   | 750.79   | 801.15  |
| Rash                   | 193.51     | 195.34       | 190.98      | 191.71  | 202.77   | 201.81   | 140.62  |
| SOB at rest            | 393.58     | 397.14       | 406.33      | 405.56  | 479.09   | 496.32   | 493.19  |
| SOB with exertion      | 957.25     | 959.16       | 959.53      | 960.89  | 1045.89  | 1050.46  | 1085.54 |
| Sore Throat            | 758.05     | 760.69       | 767.72      | 767.27  | 855.31   | 874.14   | 899.92  |
| Wheezing               | 373.17     | 375.35       | 374.05      | 374.66  | 435.96   | 444.06   | 395.88  |

SOB=shortness of breath

\* Covariates were Gender, initial symptom severity, Race, Asthma, Immunosuppression and Obesity for all models
