# Supplementary material for: Description of symptom course in a telemedicine monitoring clinic for acute symptomatic COVID-19: a retrospective cohort study
Source: PubMed Central journal article supplement — BMJ Open. 2021 Mar 5;11(3):e044154. doi: 10.1136/bmjopen-2020-044154 (PMC7938467; doi:10.1136/bmjopen-2020-044154), 2021-03-05
Supplement: bmjopen-2020-044154supp005.pdf [file bmjopen-2020-044154supp005.pdf]

Table 5 AIC for AFT models for each symptom similar comparing imputing provider assessed symptom severity with using related observation of self reported symptom severity

| Symptom                | Using patient self reported symptom severity if provider assessed symptom severity missing (log-logistic distribution) | Imputed initial provider assessed symptom severity if provider assessed symptom severity missing (log-logistic distribution) |
|------------------------|------------------------------------------------------------------------------------------------------------------------|------------------------------------------------------------------------------------------------------------------------------|
| Abdominal Pain         | 520.1                                                                                                                  | 520.1                                                                                                                        |
| Body Aches             | 1267.75                                                                                                                | 1267.75                                                                                                                      |
| Chest Tightness        | 866.08                                                                                                                 | 866.82                                                                                                                       |
| Chills                 | 1044.26                                                                                                                | 1044.66                                                                                                                      |
| Confusion              | 53.45                                                                                                                  | 53.45                                                                                                                        |
| Congestion             | 1209.54                                                                                                                | 1210.35                                                                                                                      |
| Cough                  | 1342.34                                                                                                                | 1344.29                                                                                                                      |
| Diarrhea               | 909.39                                                                                                                 | 909.37                                                                                                                       |
| Dizzy                  | 781.09                                                                                                                 | 782.33                                                                                                                       |
| Fever                  | 778.75                                                                                                                 | 778.75                                                                                                                       |
| Headache               | 1418.73                                                                                                                | 1419.43                                                                                                                      |
| Joint Pain             | 766.18                                                                                                                 | 766.18                                                                                                                       |
| Loss of smell or taste | 1113.56                                                                                                                | 1113.56                                                                                                                      |
| Nausea                 | 657.75                                                                                                                 | 657.53                                                                                                                       |
| Rash                   | 185.65                                                                                                                 | 185.65                                                                                                                       |
| SOB at rest            | 390.65                                                                                                                 | 390.65                                                                                                                       |
| SOB with exertion      | 954.27                                                                                                                 | 955.19                                                                                                                       |
| Sore Throat            | 757.25                                                                                                                 | 757.25                                                                                                                       |
| Wheezing               | 368.78                                                                                                                 | 368.78                                                                                                                       |

SOB=shortness of breath
