# Supplementary material for: Description of symptom course in a telemedicine monitoring clinic for acute symptomatic COVID-19: a retrospective cohort study
Source: PubMed Central journal article supplement — BMJ Open. 2021 Mar 5;11(3):e044154. doi: 10.1136/bmjopen-2020-044154 (PMC7938467; doi:10.1136/bmjopen-2020-044154), 2021-03-05

Figure 2 Goodness of fit, Kaplan Meier estimation of residual plotted against log-logistic and log-normal distribution side by side for comparison

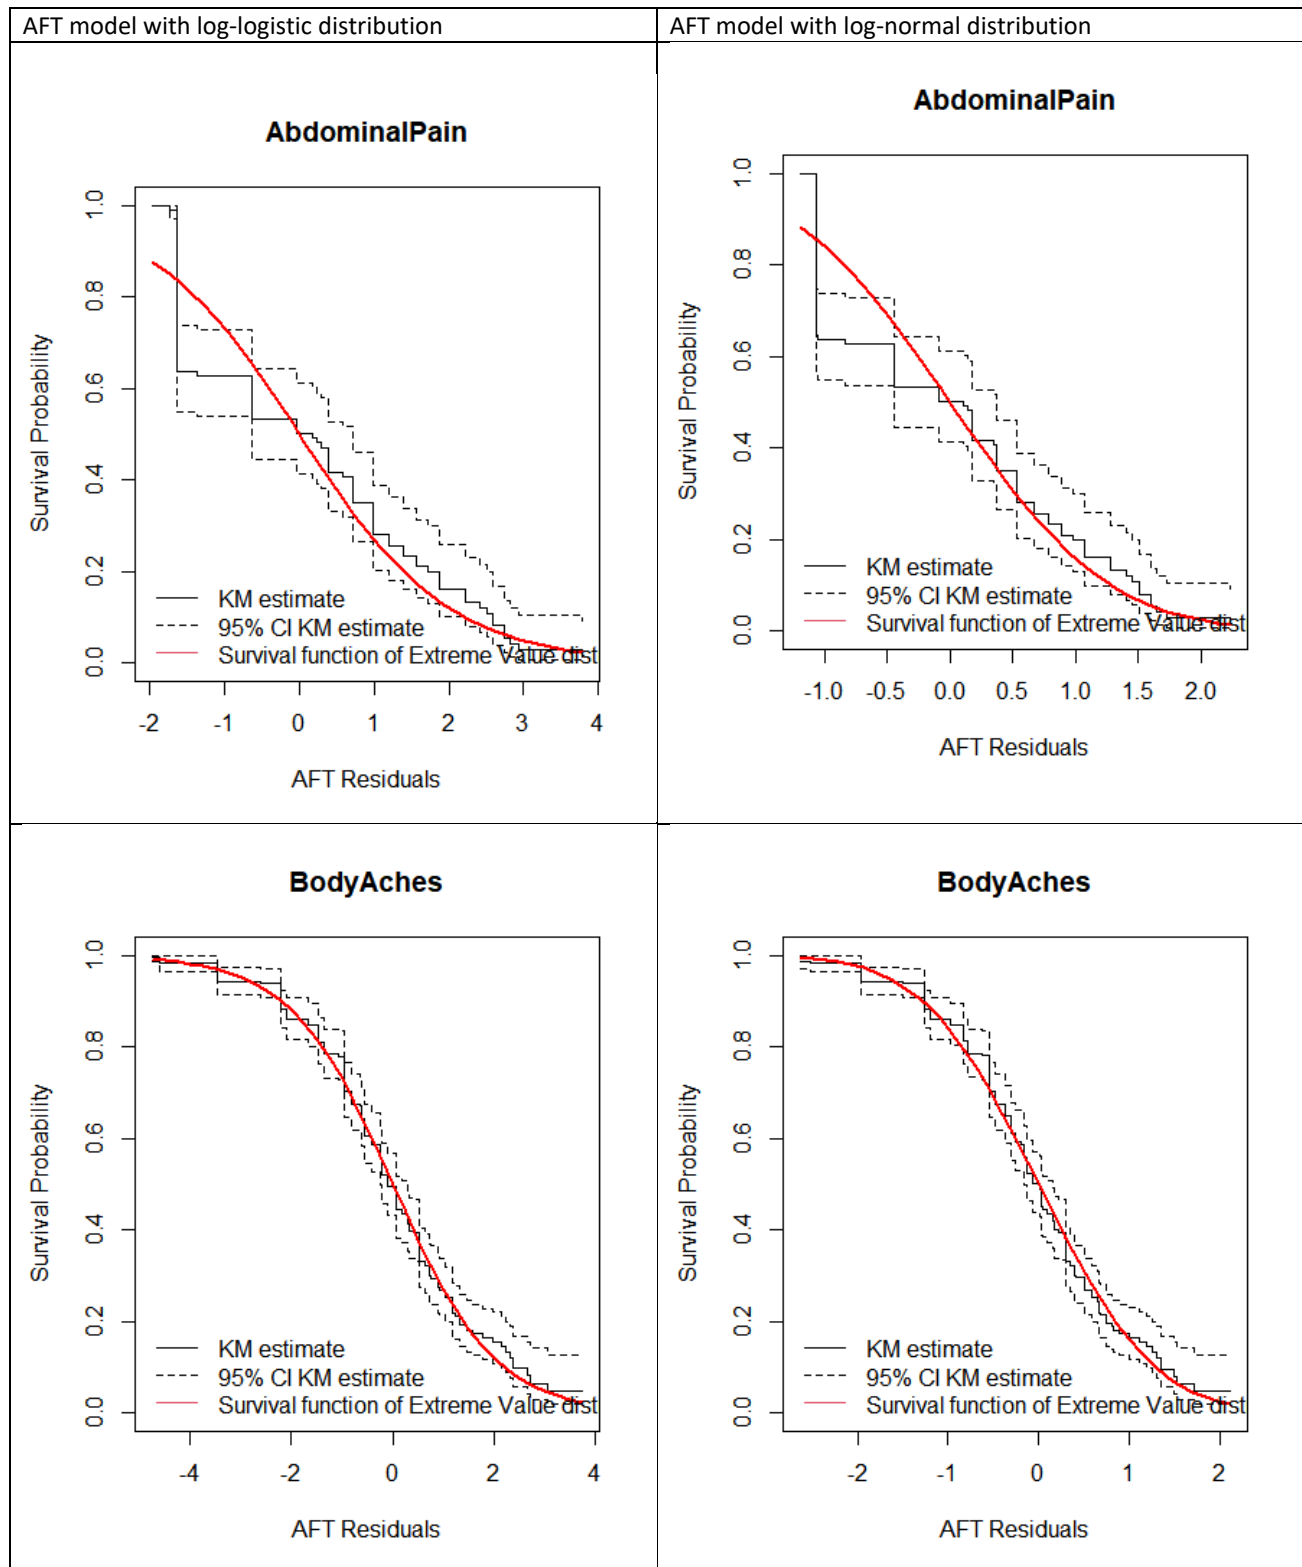

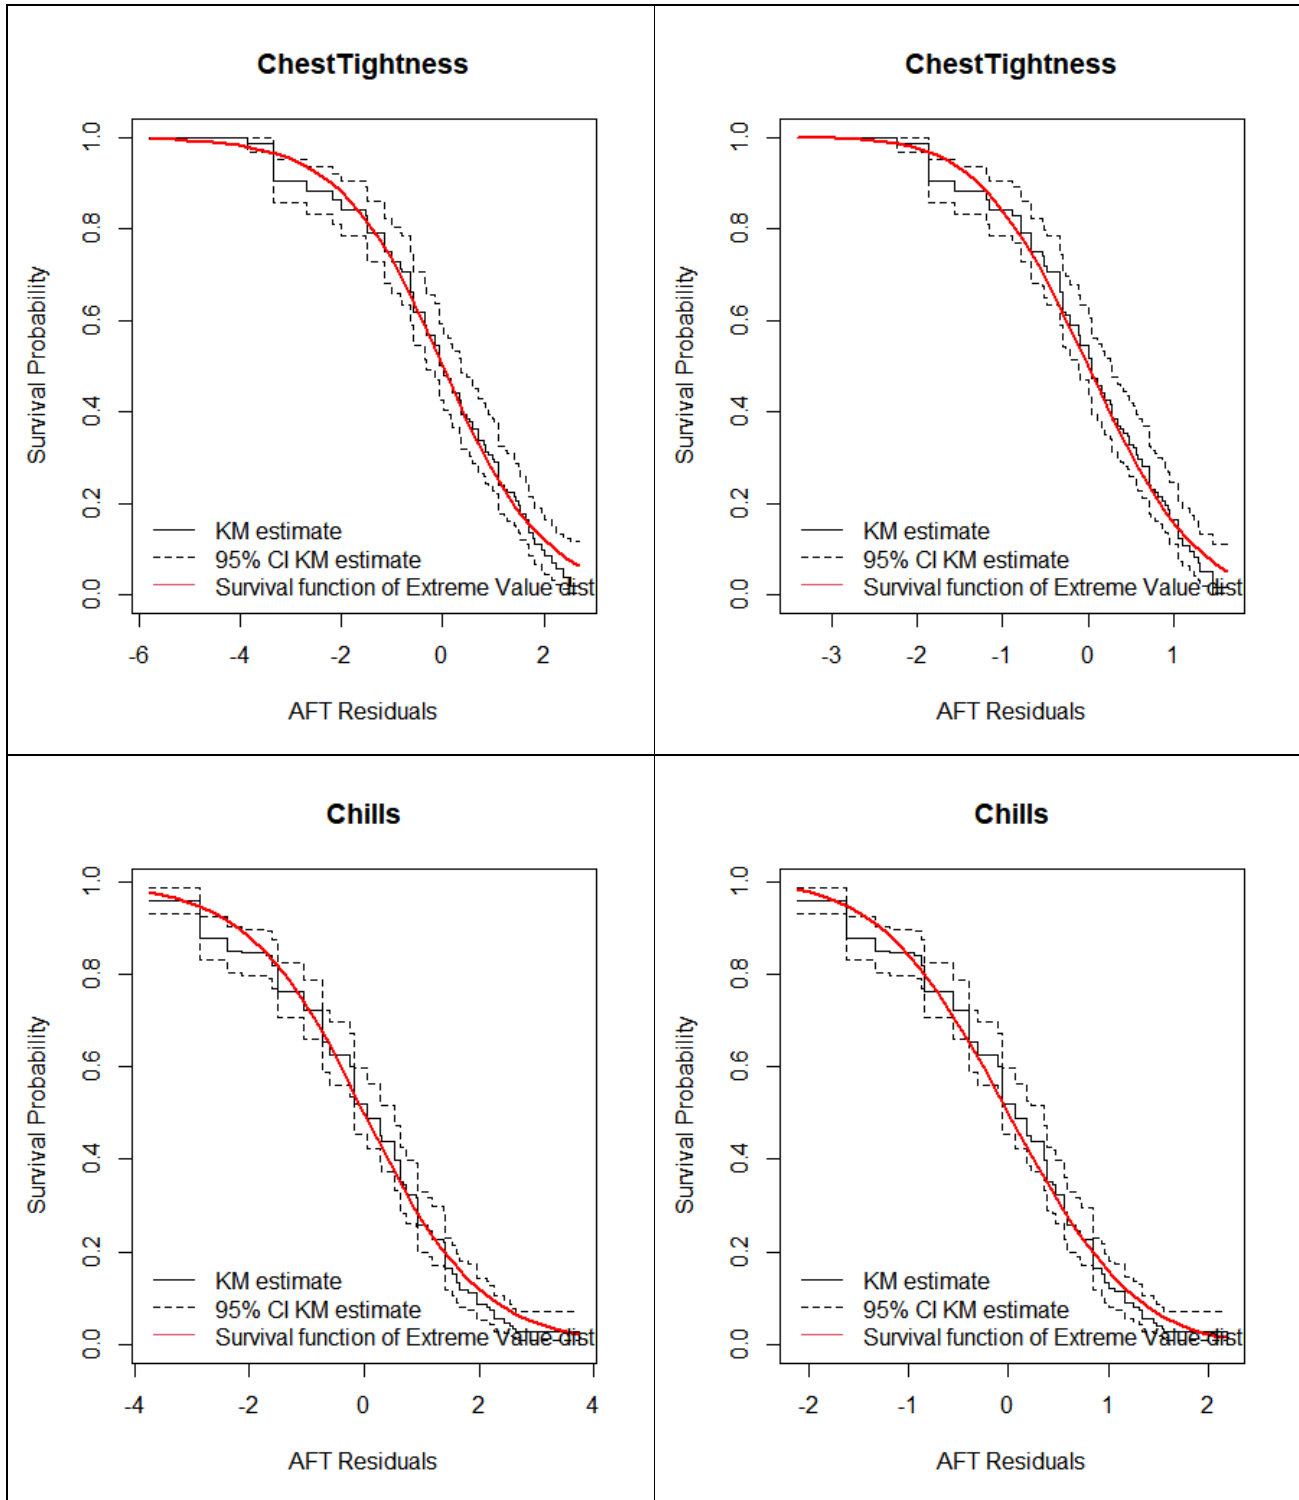

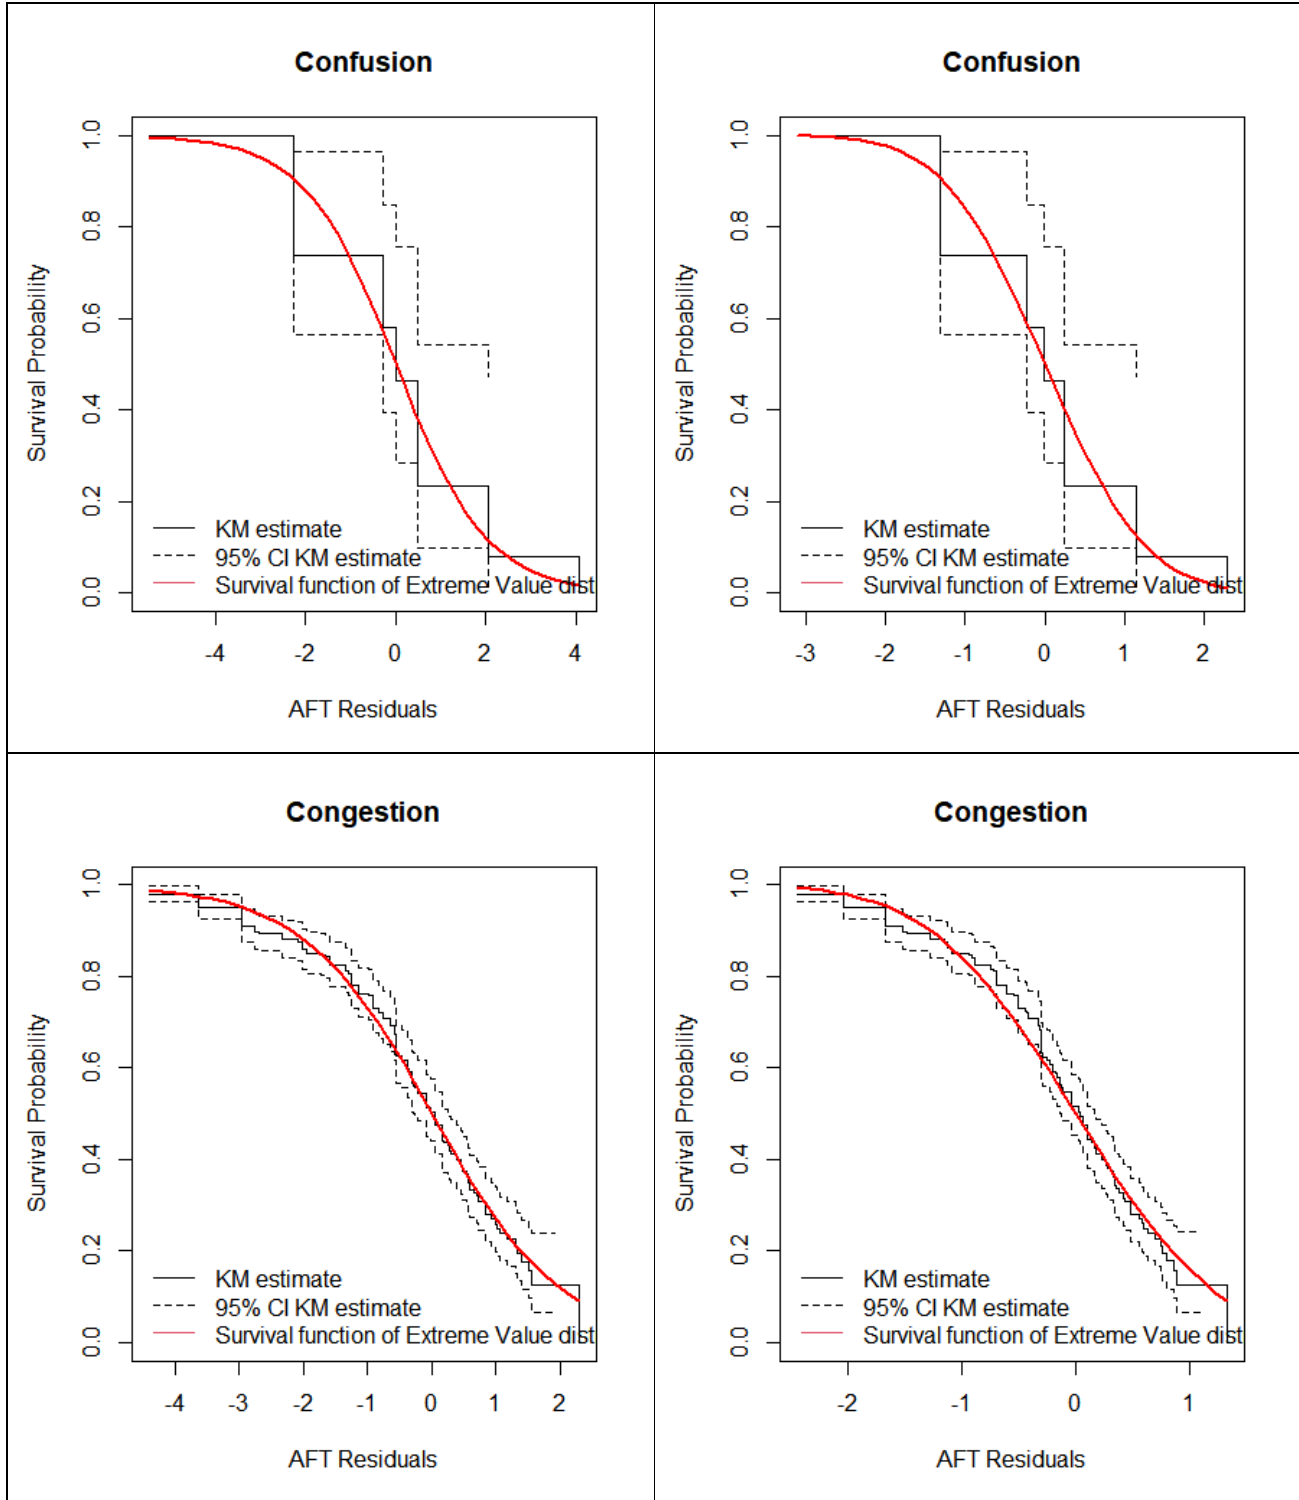

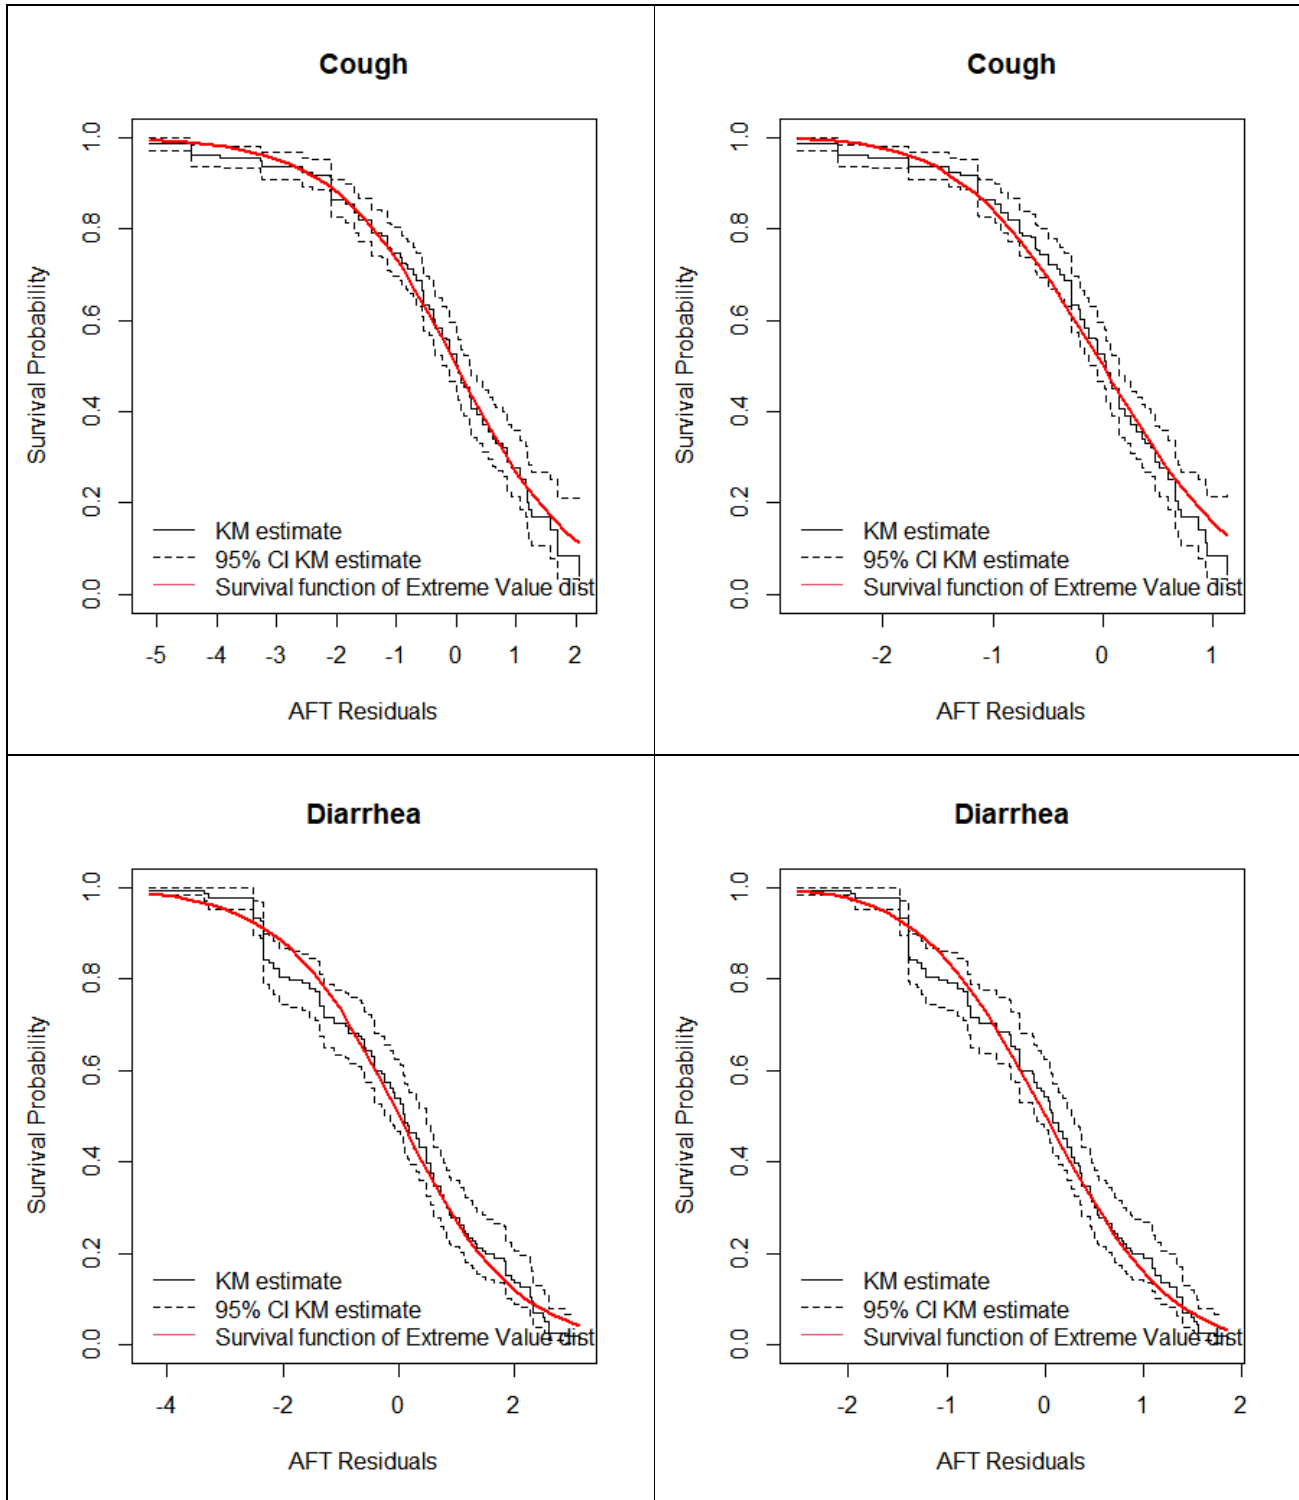

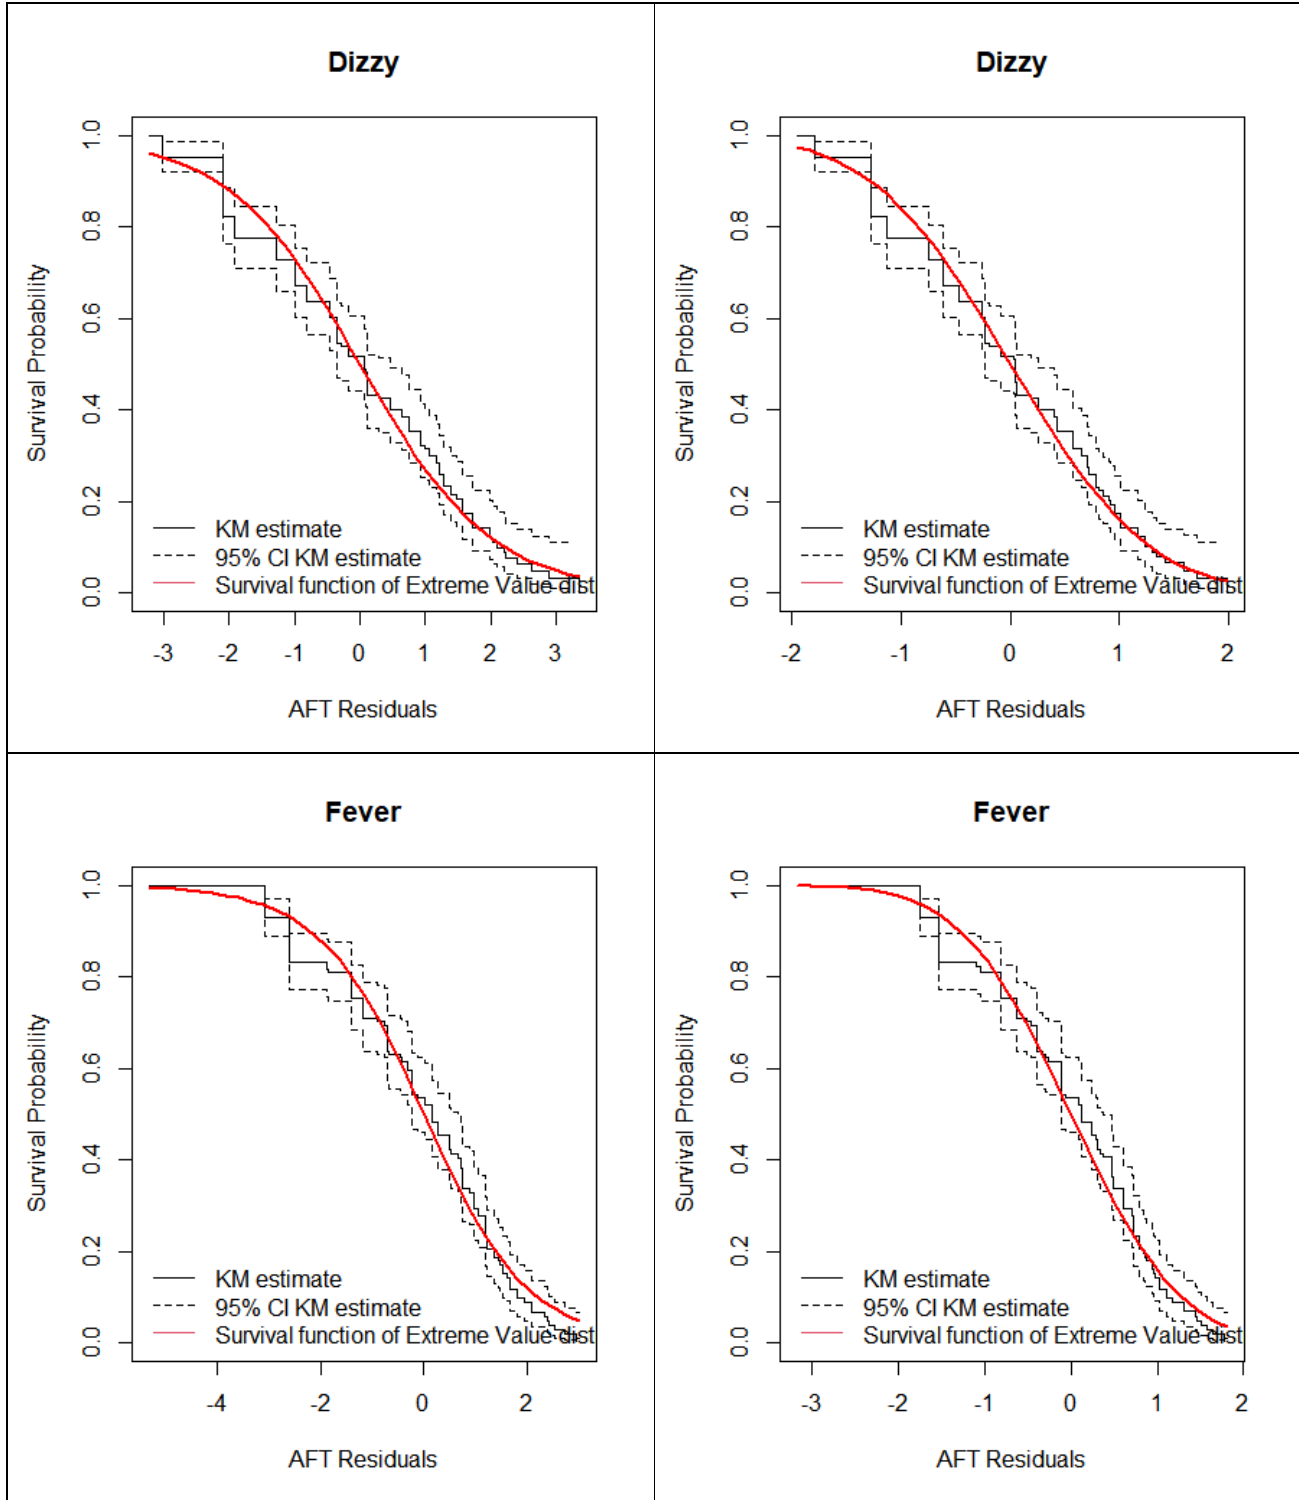

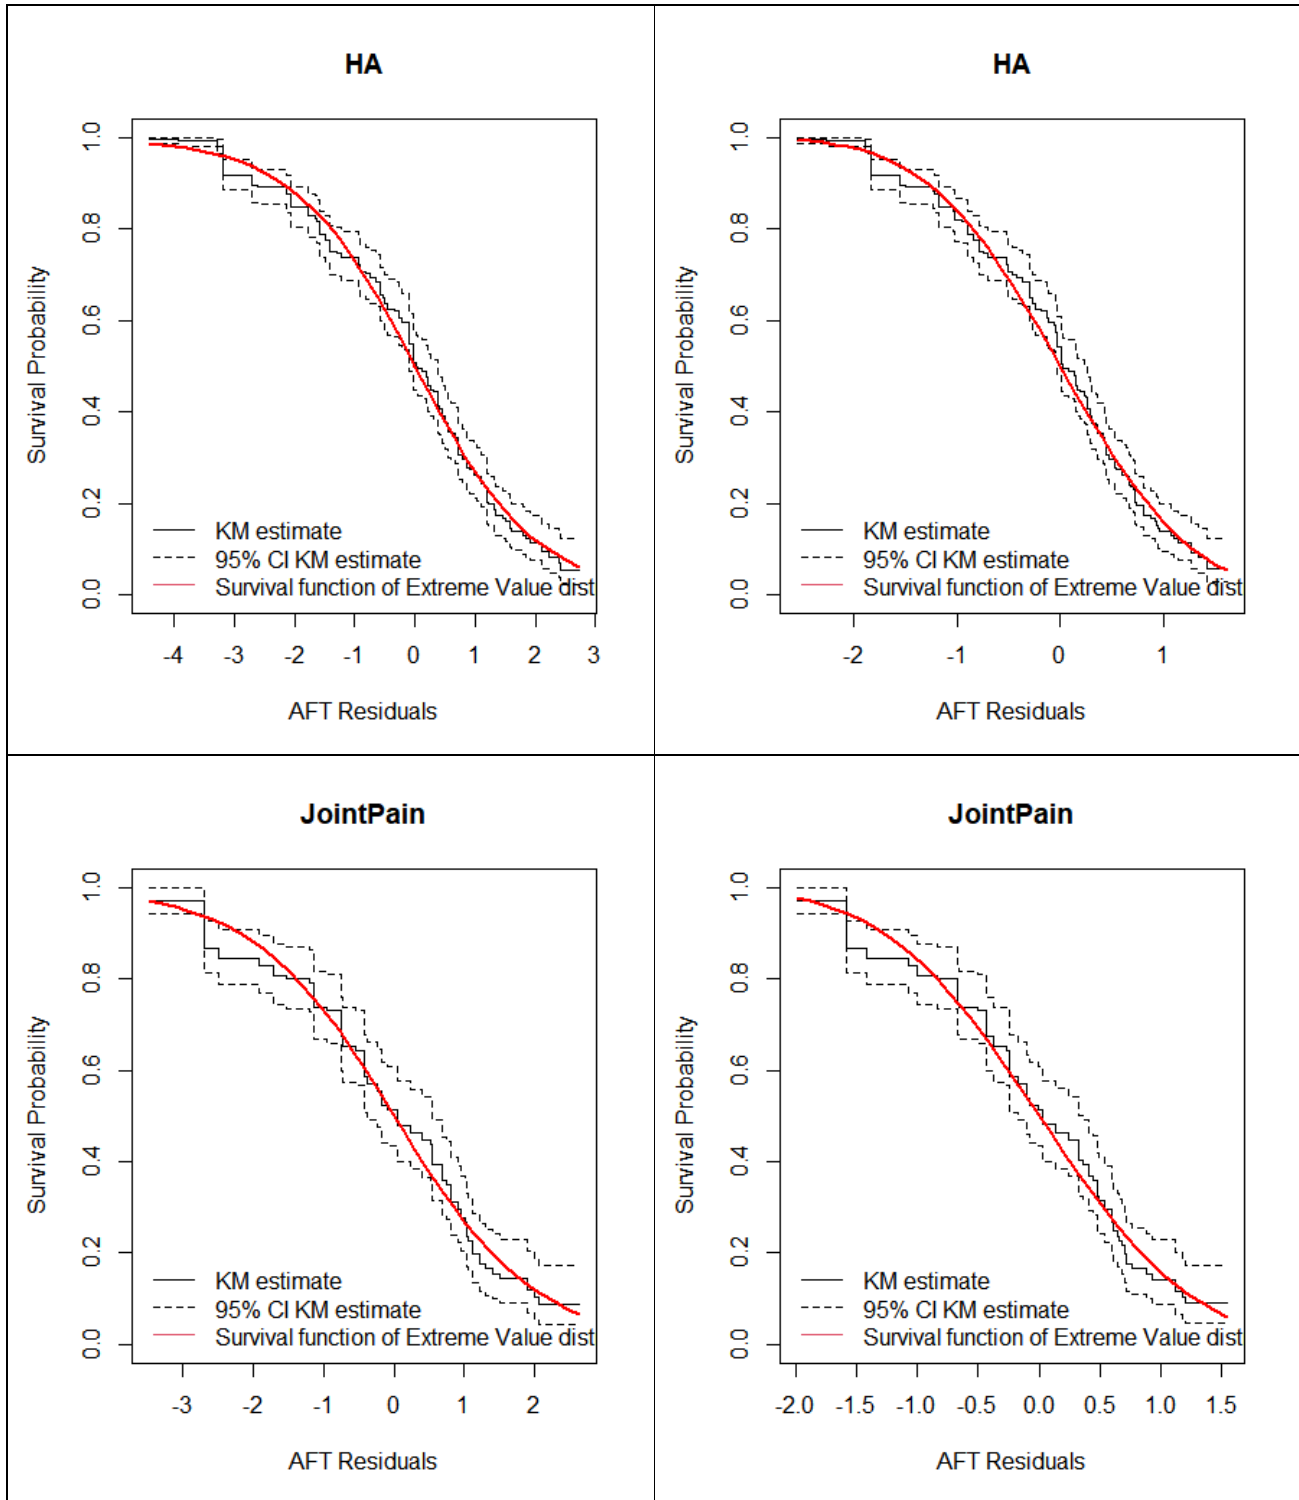

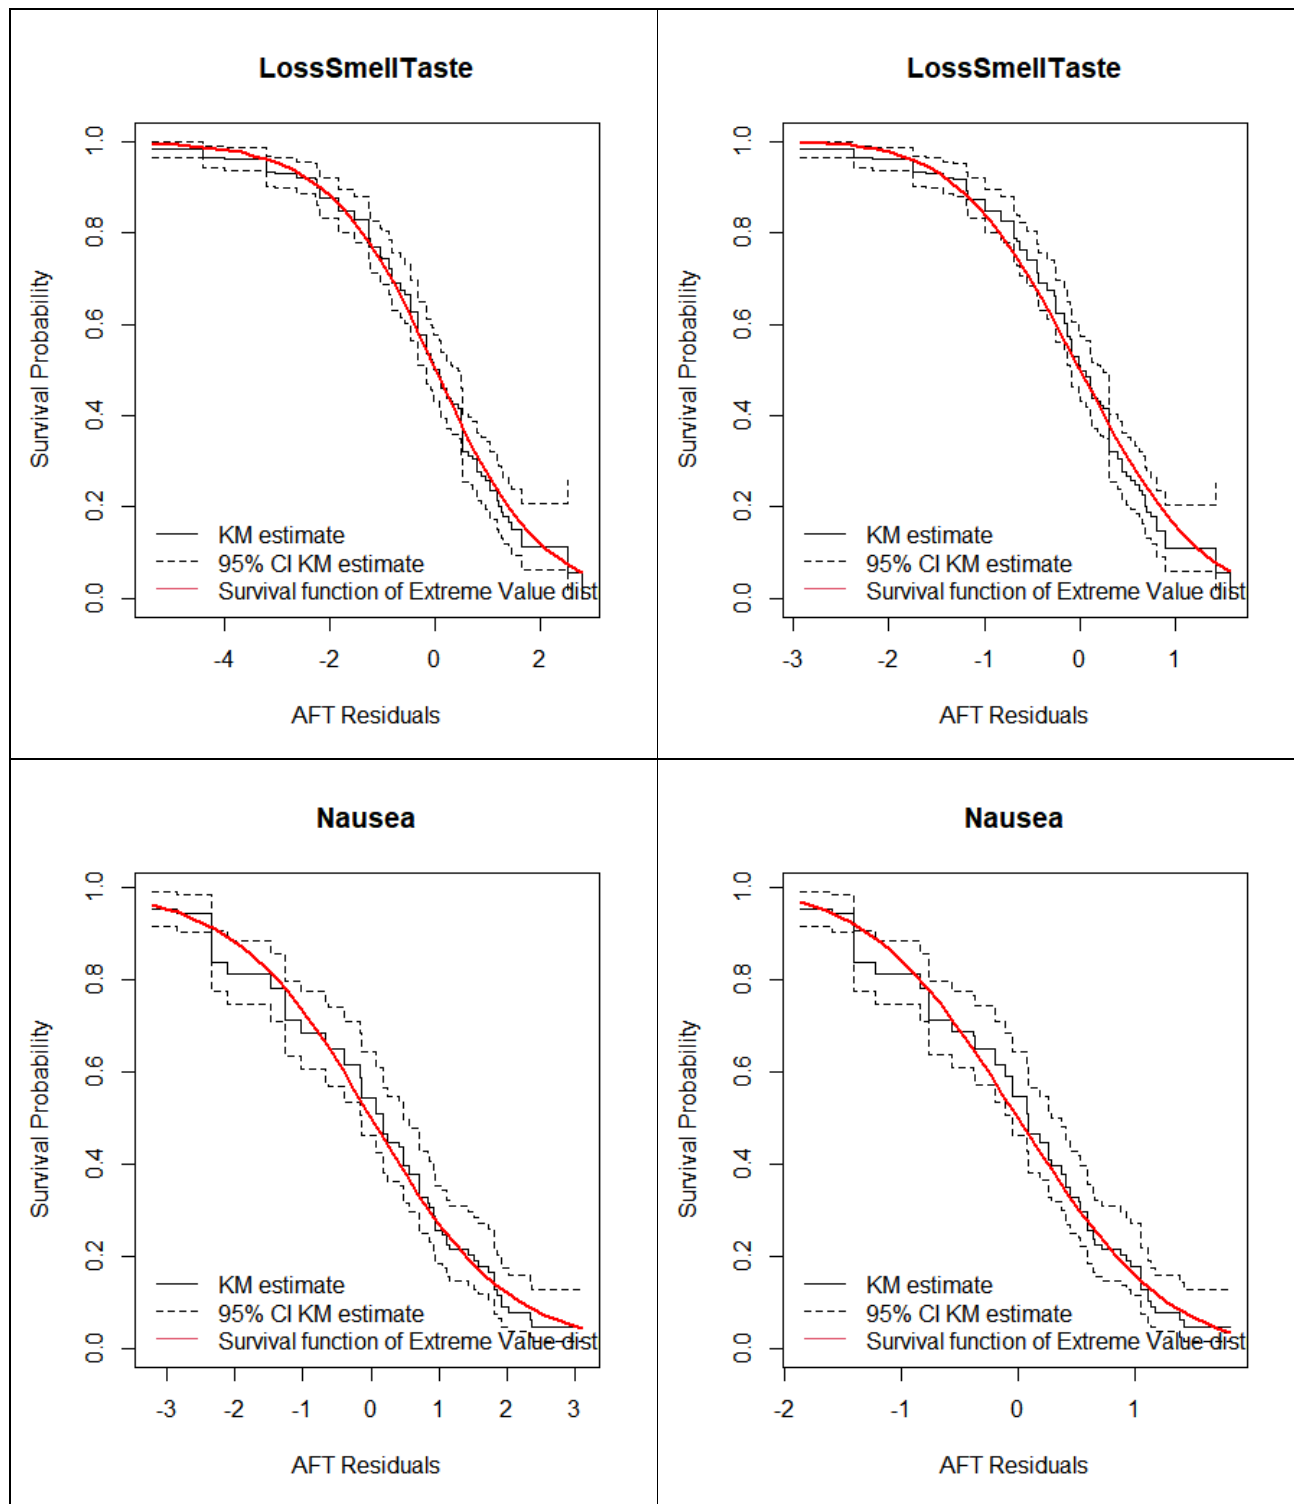

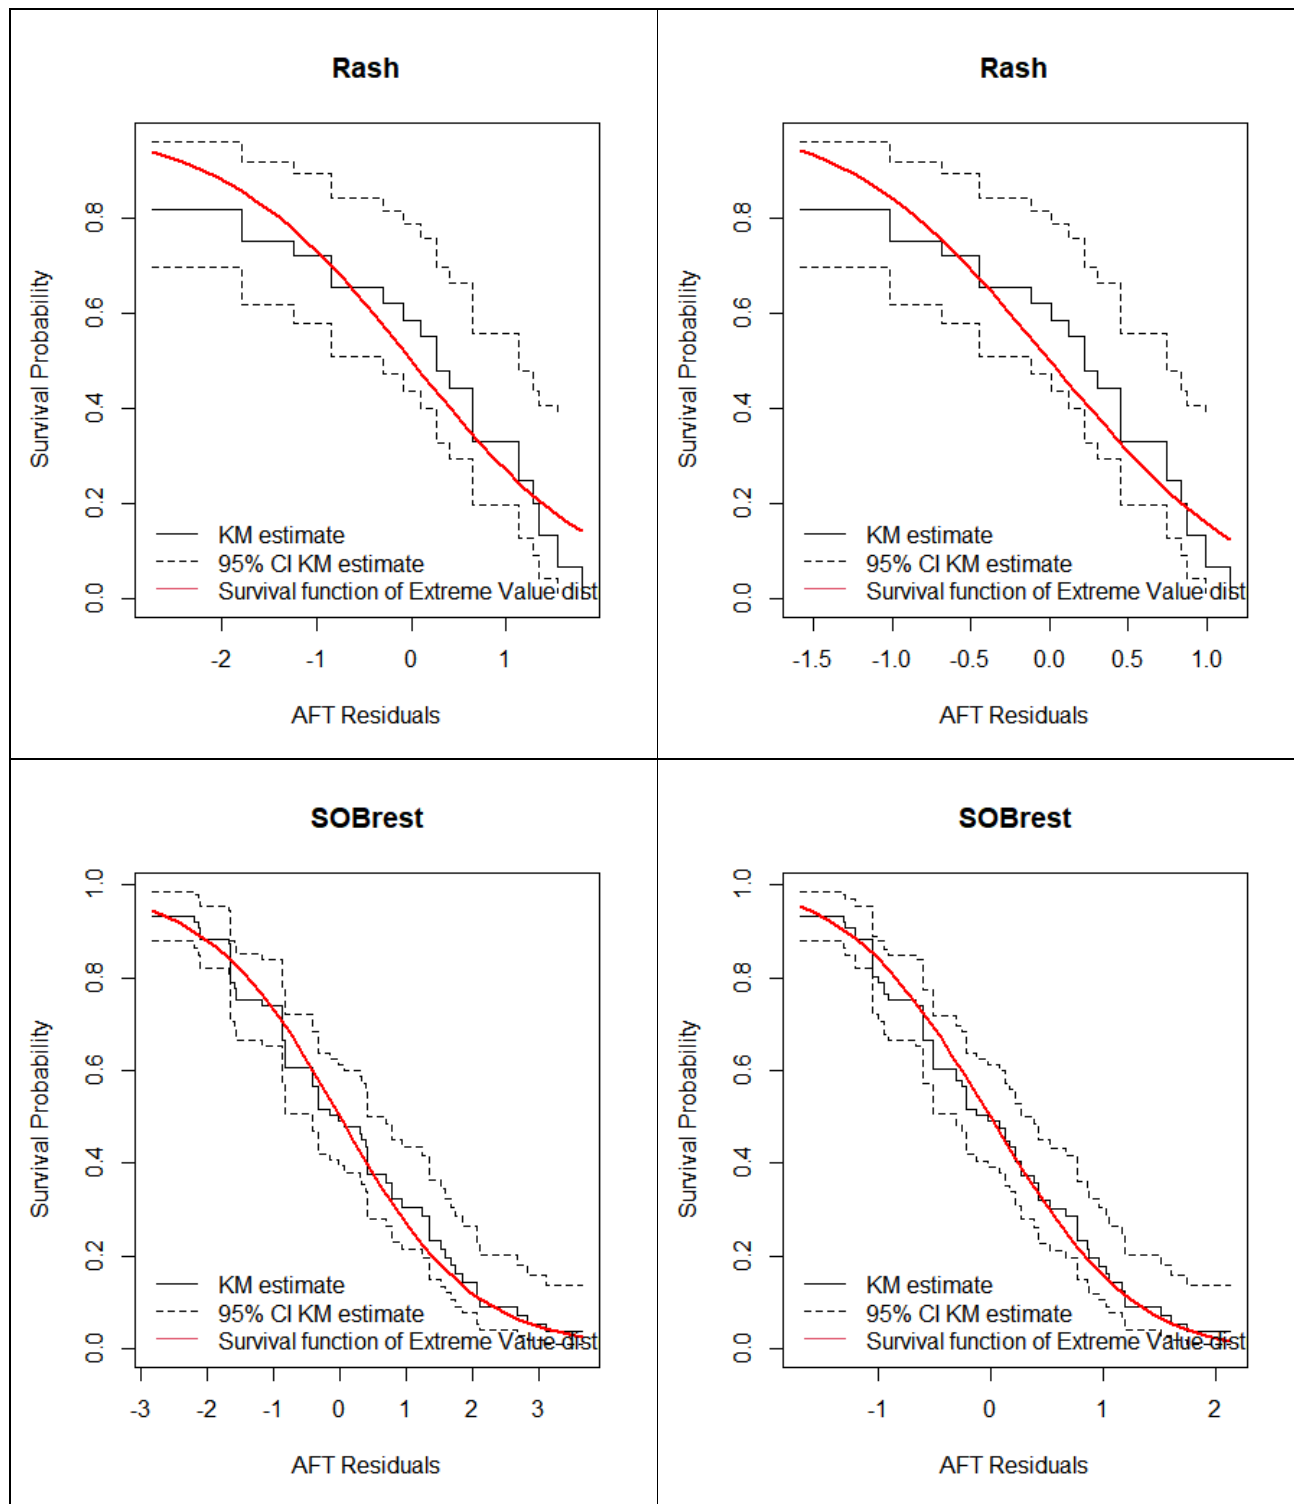



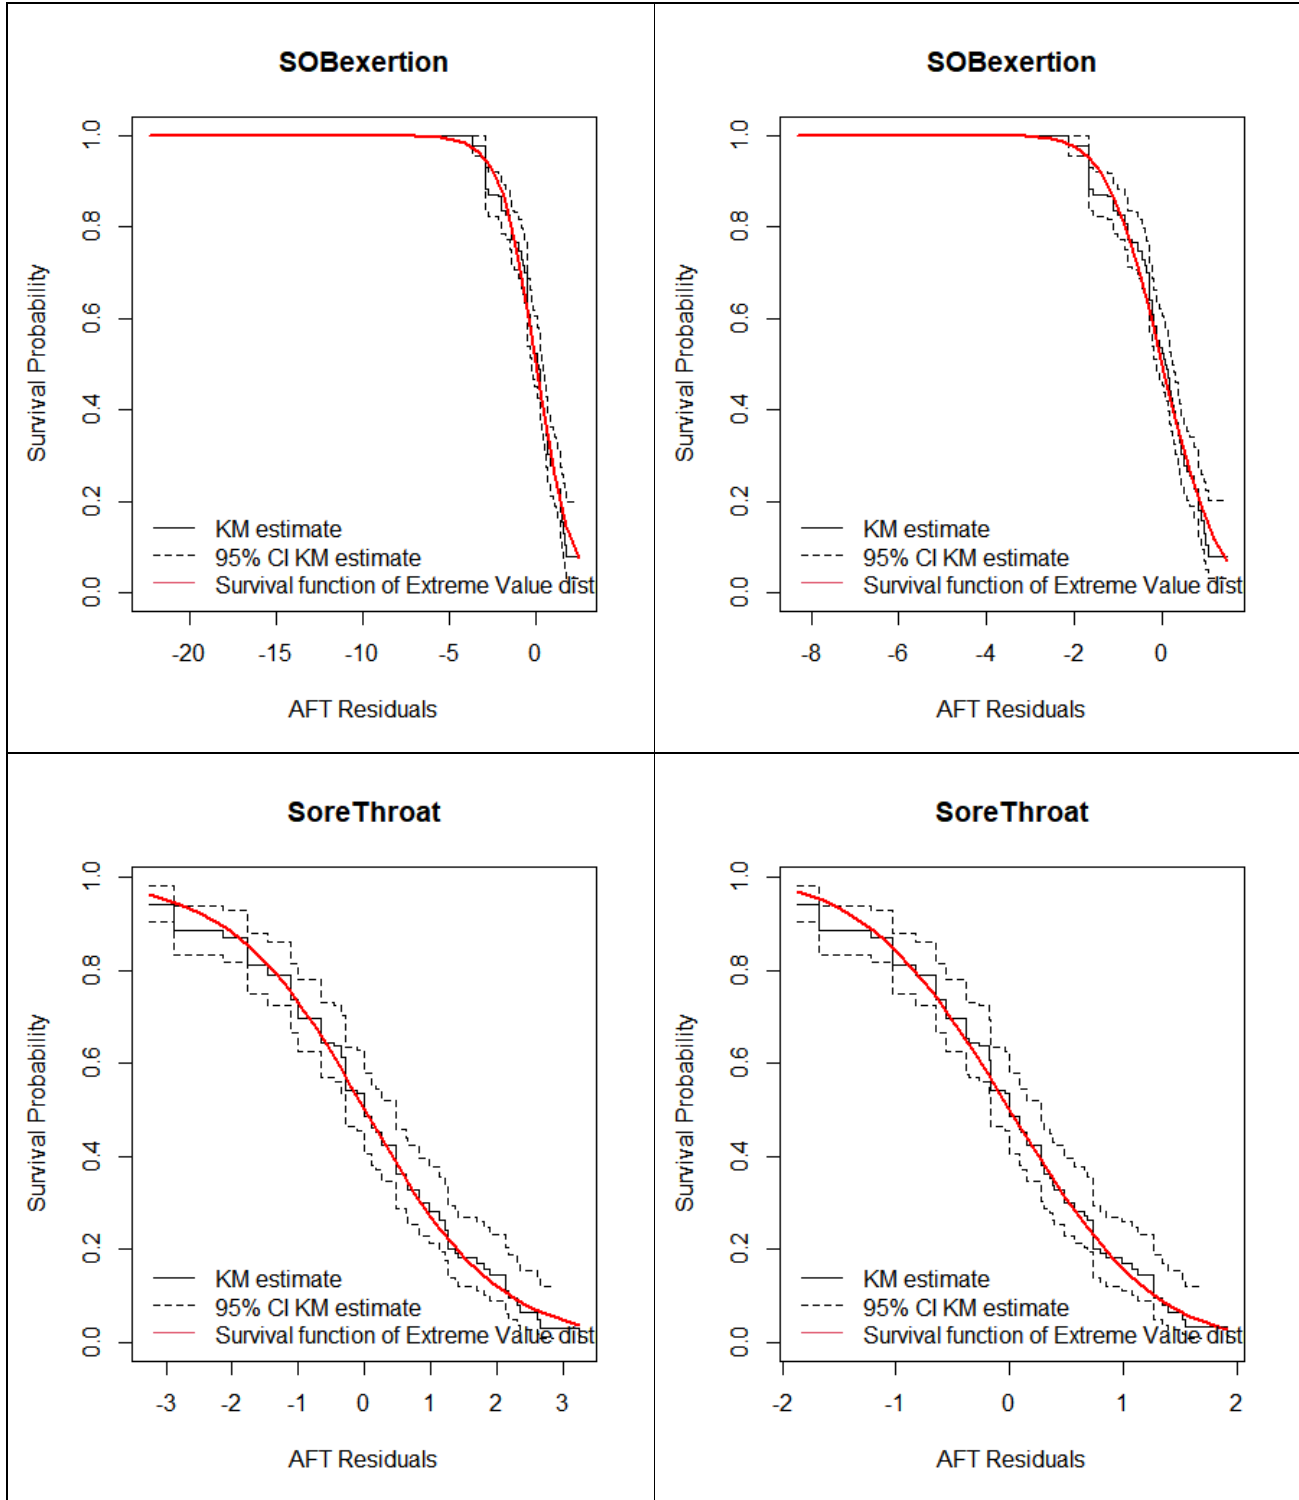

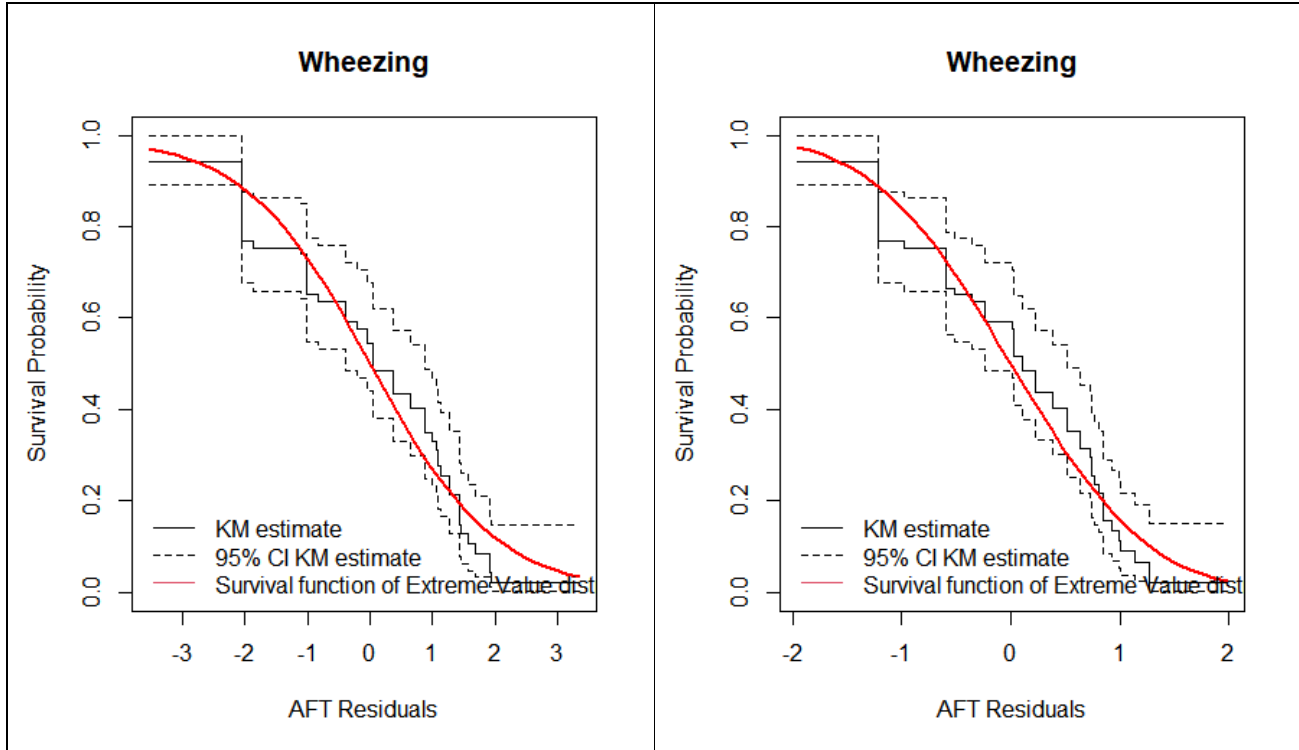

Supplement: bmjopen-2020-044154supp007.pdf [file bmjopen-2020-044154supp007.pdf]
